# Supplementary material for: Политическая модернизация и формирование элиты госуправления в России
Source: MDPI journal article supplement (doi:10.3390/nano12111899), 2010-01-01
Supplement: s1 [file s1]

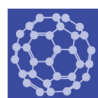

## Supplementary Material

# MPTHub: An Open-Source Software for Characterizing the Transport of Particles in Biorelevant Media

Leandro Gabriel <sup>1,2,3,†</sup>, Helena Almeida <sup>1,2,4,†</sup>, Marta Avelar <sup>1,2,3,4</sup>, Bruno Sarmento <sup>1,2,5</sup> and José das Neves <sup>1,2,5,\*</sup>

<sup>1</sup> i3S—Instituto de Investigação e Inovação em Saúde, Universidade do Porto, 4200-135 Porto, Portugal; lassig@protonmail.com (L.G.); helena.almeida@i3s.up.pt (H.A.); mavelar@i3s.up.pt (M.A.); bruno.sarmiento@i3s.up.pt (B.S.)

<sup>2</sup> INEB—Instituto de Engenharia Biomédica, Universidade do Porto, 4200-135 Porto, Portugal

<sup>3</sup> FEUP—Faculdade de Engenharia, Universidade do Porto, 4200-465 Porto, Portugal

<sup>4</sup> ICBAS—Instituto de Ciências Biomédicas Abel Salazar, Universidade do Porto, 4050-313 Porto, Portugal

<sup>5</sup> IUCS—Instituto Universitário de Ciências da Saúde, CESPU, 4585-116 Gandra, Portugal

\* Correspondence: j.dasneves@i3s.up.pt; Tel.: +351-220-408-800

† These authors contributed equally to this work.

**Table S1.** Details of the three computers used for testing the performance of MPTHub.

| Computer | Properties                                                        |
|----------|-------------------------------------------------------------------|
| #1       | Intel® Core™ i7-1165G7 processor (12M Cache, 2.80 GHz), 16 GB RAM |
| #2       | Intel® Core™ i7-4500U processor (4M Cache, 2.40 GHz), 16 GB RAM   |
| #3       | Intel® Core™ i3-7020U processor (3M Cache, 2.30 GHz), 4 GB RAM    |

|    | A                 | B                        | C                        | D                        | E                        | F                        | G                        |        |
|----|-------------------|--------------------------|--------------------------|--------------------------|--------------------------|--------------------------|--------------------------|--------|
| 1  |                   |                          |                          |                          |                          |                          |                          |        |
| 2  | Timescale (τ) (s) | MSD 1 (μm <sup>2</sup> ) | MSD 2 (μm <sup>2</sup> ) | MSD 3 (μm <sup>2</sup> ) | MSD 4 (μm <sup>2</sup> ) | MSD 5 (μm <sup>2</sup> ) | MSD 6 (μm <sup>2</sup> ) | MSD    |
| 3  | 0,033             | 0,3595162                | 0,335247965              | 0,358997906              | 0,321676024              | 0,333997556              | 0,346448755              | 0,324  |
| 4  | 0,066             | 0,748341197              | 0,711585943              | 0,805129822              | 0,663219512              | 0,739098928              | 0,696488509              | 0,700  |
| 5  | 0,099             | 1,120268097              | 1,174051432              | 1,304841505              | 0,921620463              | 1,121483404              | 1,091246289              | 1,082  |
| 6  | 0,132             | 1,469545014              | 1,622128414              | 1,852732019              | 1,169742825              | 1,502705168              | 1,509443649              | 1,435  |
| 7  | 0,165             | 1,766896682              | 2,115902296              | 2,444736938              | 1,445253865              | 1,923771135              | 1,929793572              | 1,81   |
| 8  | 0,198             | 2,051934254              | 2,575221646              | 3,10054382               | 1,741620877              | 2,342187519              | 2,372116057              | 2,145  |
| 9  | 0,231             | 2,386773102              | 3,061268762              | 3,822138155              | 2,060132619              | 2,830352796              | 2,805928233              | 2,534  |
| 10 | 0,264             | 2,658738134              | 3,526845485              | 4,650600635              | 2,367288709              | 3,340736842              | 3,214870477              | 2,95   |
| 11 | 0,297             | 2,958861547              | 4,01410966               | 5,510904781              | 2,69034476               | 3,831873943              | 3,625852242              | 3,291  |
| 12 | 0,33              | 3,247820116              | 4,489055587              | 6,452327422              | 3,045685978              | 4,386212756              | 4,001671855              | 3,587  |
| 13 | 0,363             | 3,581053401              | 4,951982046              | 7,454170951              | 3,409032259              | 4,904573731              | 4,363976118              | 3,847  |
| 14 | 0,396             | 3,899347909              | 5,388378578              | 8,51775556               | 3,806257712              | 5,429963842              | 4,739145238              | 4,128  |
| 15 | 0,429             | 4,227369462              | 5,815310817              | 9,589483376              | 4,188656076              | 6,008060872              | 5,100205105              | 4,425  |
| 16 | 0,462             | 4,566077196              | 6,272755398              | 10,6501328               | 4,588058194              | 6,624934629              | 5,481468795              | 4,763  |
| 17 | 0,495             | 4,919439938              | 6,703528742              | 11,68843967              | 5,00981054               | 7,215740261              | 5,873351624              | 5,082  |
| 18 | 0,528             | 5,267429448              | 7,163502192              | 12,78841263              | 5,461927387              | 7,903729865              | 6,283843286              | 5,382  |
| 19 | 0,561             | 5,570356636              | 7,629477234              | 13,94870602              | 5,815024209              | 8,63011697               | 6,643446367              | 5,676  |
| 20 | 0,594             | 5,80779689               | 8,134563816              | 15,08818778              | 6,206112829              | 9,399158759              | 7,045882493              | 6,035  |
| 21 | 0,627             | 6,055795755              | 8,678496593              | 16,24581773              | 6,547470114              | 10,17977257              | 7,4744327                | 6,390  |
| 22 | 0,66              | 6,37880983               | 9,26087019               | 17,42309556              | 6,822020101              | 10,99886098              | 7,937936049              | 6,738  |
| 23 | 0,693             | 6,660967315              | 9,788877614              | 18,52471306              | 7,147855432              | 11,8297804               | 8,422138196              | 7,098  |
| 24 | 0,726             | 7,017850546              | 10,38580921              | 19,74687562              | 7,476905524              | 12,66147328              | 8,934702678              | 7,512  |
| 25 | 0,759             | 7,345536493              | 11,03392893              | 21,00784292              | 7,78728221               | 13,47645427              | 9,418716461              | 7,894  |
| 26 | 0,792             | 7,624468151              | 11,71663269              | 22,24751252              | 8,064465729              | 14,3568269               | 9,888562771              | 8,255  |
| 27 | 0,825             | 7,903714939              | 12,41822614              | 23,43156142              | 8,277424859              | 15,32329787              | 10,30654166              | 8,601  |
| 28 | 0,858             | 8,197189283              | 13,10474539              | 24,54026547              | 8,413704862              | 16,35429489              | 10,72432633              | 8,925  |
| 29 | 0,891             | 8,50455386               | 13,78673335              | 25,65307447              | 8,537760083              | 17,42761174              | 11,00350056              | 9,271  |
| 30 | 0,924             | 8,81196796               | 14,46984122              | 26,76618347              | 8,657760083              | 18,54072365              | 11,28350056              | 9,617  |
| 31 | 0,957             | 9,11938003               | 15,15294899              | 27,87929248              | 8,777760083              | 19,65383556              | 11,56350056              | 9,963  |
| 32 | 0,99              | 9,4267921                | 15,8360561               | 28,99240149              | 8,897760083              | 20,76694647              | 11,84350056              | 10,309 |
| 33 | 1,023             | 9,73420417               | 16,51916321              | 30,1055105               | 9,017760083              | 21,88005738              | 12,12350056              | 10,655 |
| 34 | 1,056             | 10,04161624              | 17,20227032              | 31,21861951              | 9,137760083              | 22,99316829              | 12,40350056              | 11,001 |
| 35 | 1,089             | 10,34902831              | 17,88537743              | 32,33172852              | 9,257760083              | 24,1062792               | 12,68350056              | 11,347 |
| 36 | 1,122             | 10,65644038              | 18,56848454              | 33,44483753              | 9,377760083              | 25,21939011              | 12,96350056              | 11,693 |
| 37 | 1,155             | 10,96385245              | 19,25159165              | 34,55794654              | 9,497760083              | 26,33250102              | 13,24350056              | 12,039 |
| 38 | 1,188             | 11,27126452              | 19,93469876              | 35,67105555              | 9,617760083              | 27,44561193              | 13,52350056              | 12,385 |
| 39 | 1,221             | 11,57867659              | 20,61780587              | 36,78416456              | 9,737760083              | 28,55872284              | 13,80350056              | 12,731 |
| 40 | 1,254             | 11,88608866              | 21,30091298              | 37,89727357              | 9,857760083              | 29,67183375              | 14,08350056              | 13,077 |
| 41 | 1,287             | 12,19350073              | 21,98402009              | 39,01038258              | 9,977760083              | 30,78494466              | 14,36350056              | 13,423 |
| 42 | 1,32              | 12,5009128               | 22,6671272               | 40,12349159              | 10,097760083             | 31,89805557              | 14,64350056              | 13,769 |
| 43 | 1,353             | 12,80832487              | 23,35023431              | 41,2366006               | 10,217760083             | 33,01116648              | 14,92350056              | 14,115 |
| 44 | 1,386             | 13,11573694              | 24,03334142              | 42,34970961              | 10,337760083             | 34,12427739              | 15,20350056              | 14,461 |
| 45 | 1,419             | 13,42314901              | 24,71644853              | 43,46281862              | 10,457760083             | 35,2373883               | 15,48350056              | 14,807 |
| 46 | 1,452             | 13,73056108              | 25,40000000              | 44,57592763              | 10,577760083             | 36,35049921              | 15,76350056              | 15,153 |
| 47 | 1,485             | 14,03797315              | 26,08310711              | 45,68903664              | 10,697760083             | 37,46361012              | 16,04350056              | 15,499 |
| 48 | 1,518             | 14,34538522              | 26,76621422              | 46,80214565              | 10,817760083             | 38,57672103              | 16,32350056              | 15,845 |
| 49 | 1,551             | 14,65279729              | 27,44932133              | 47,91525466              | 10,937760083             | 39,68983194              | 16,60350056              | 16,191 |
| 50 | 1,584             | 14,96020936              | 28,13242844              | 49,02836367              | 11,057760083             | 40,80294285              | 16,88350056              | 16,537 |
| 51 | 1,617             | 15,26762143              | 28,81553555              | 50,14147268              | 11,177760083             | 41,91605376              | 17,16350056              | 16,883 |
| 52 | 1,65              | 15,5750335               | 29,49864266              | 51,25458169              | 11,297760083             | 43,02916467              | 17,44350056              | 17,229 |
| 53 | 1,683             | 15,88244557              | 30,18174977              | 52,3676907               | 11,417760083             | 44,14227558              | 17,72350056              | 17,575 |
| 54 | 1,716             | 16,18985764              | 30,86485688              | 53,48079971              | 11,537760083             | 45,25538649              | 18,00350056              | 17,921 |
| 55 | 1,749             | 16,49726971              | 31,54796399              | 54,59390872              | 11,657760083             | 46,3684974               | 18,28350056              | 18,267 |
| 56 | 1,782             | 16,80468178              | 32,2310711               | 55,70701773              | 11,777760083             | 47,48160831              | 18,56350056              | 18,613 |
| 57 | 1,815             | 17,11209385              | 32,91417821              | 56,82012674              | 11,897760083             | 48,59471922              | 18,84350056              | 18,959 |
| 58 | 1,848             | 17,41950592              | 33,59728532              | 57,93323575              | 12,017760083             | 49,70783013              | 19,12350056              | 19,305 |
| 59 | 1,881             | 17,72691799              | 34,28039243              | 59,04634476              | 12,137760083             | 50,82094104              | 19,40350056              | 19,651 |
| 60 | 1,914             | 18,03433006              | 34,96349954              | 60,15945377              | 12,257760083             | 51,93405195              | 19,68350056              | 20,000 |
| 61 | 1,947             | 18,34174213              | 35,64660665              | 61,27256278              | 12,377760083             | 53,04716286              | 19,96350056              | 20,346 |
| 62 | 1,98              | 18,6491542               | 36,32971376              | 62,38567179              | 12,497760083             | 54,16027377              | 20,24350056              | 20,692 |
| 63 | 2,013             | 18,95656627              | 37,01282087              | 63,4987808               | 12,617760083             | 55,27338468              | 20,52350056              | 21,038 |
| 64 | 2,046             | 19,26397834              | 37,69592798              | 64,61188981              | 12,737760083             | 56,38649559              | 20,80350056              | 21,384 |
| 65 | 2,079             | 19,57139041              | 38,37903509              | 65,72500082              | 12,857760083             | 57,4996065               | 21,08350056              | 21,730 |
| 66 | 2,112             | 19,87880248              | 39,0621422               | 66,83811183              | 12,977760083             | 58,61271741              | 21,36350056              | 22,076 |
| 67 | 2,145             | 20,18621455              | 39,74524931              | 67,94722284              | 13,097760083             | 59,72582832              | 21,64350056              | 22,422 |
| 68 | 2,178             | 20,49362662              | 40,42835642              | 69,05633385              | 13,217760083             | 60,83893923              | 21,92350056              | 22,768 |
| 69 | 2,211             | 20,80103869              | 41,11146353              | 70,16544486              | 13,337760083             | 61,95205014              | 22,20350056              | 23,114 |
| 70 | 2,244             | 21,10845076              | 41,79457064              | 71,27455587              | 13,457760083             | 63,06516105              | 22,48350056              | 23,460 |
| 71 | 2,277             | 21,41586283              | 42,47767775              | 72,38366688              | 13,577760083             | 64,17827196              | 22,76350056              | 23,806 |
| 72 | 2,31              | 21,7232749               | 43,16078486              | 73,49277789              | 13,697760083             | 65,29138287              | 23,04350056              | 24,152 |
| 73 | 2,343             | 22,03068697              | 43,84389197              | 74,6018889               | 13,817760083             | 66,40449378              | 23,32350056              | 24,498 |
| 74 | 2,376             | 22,33809904              | 44,52700008              | 75,71100001              | 13,937760083             | 67,51760469              | 23,60350056              | 24,844 |
| 75 | 2,409             | 22,64551111              | 45,21010719              | 76,82011102              | 14,057760083             | 68,6307156               | 23,88350056              | 25,190 |
| 76 | 2,442             | 22,95292318              | 45,8932143               | 77,92922203              | 14,177760083             | 69,74382651              | 24,16350056              | 25,536 |
| 77 | 2,475             | 23,26033525              | 46,57632141              | 79,03833304              | 14,297760083             | 70,85693742              | 24,44350056              | 25,882 |
| 78 | 2,508             | 23,56774732              | 47,25942852              | 80,14744405              | 14,417760083             | 71,97004833              | 24,72350056              | 26,228 |
| 79 | 2,541             | 23,87515939              | 47,94253563              | 81,25655506              | 14,537760083             | 73,08315924              | 25,00350056              | 26,574 |
| 80 | 2,574             | 24,18257146              | 48,62564274              | 82,36566607              | 14,657760083             | 74,19627015              | 25,28350056              | 26,920 |
| 81 | 2,607             | 24,48998353              | 49,30874985              | 83,47477708              | 14,777760083             | 75,30938106              | 25,56350056              | 27,266 |
| 82 | 2,64              | 24,7973956               | 49,99185696              | 84,58388809              | 14,897760083             | 76,42249197              | 25,84350056              | 27,612 |
| 83 | 2,673             | 25,10480767              | 50,67496407              | 85,69300001              | 15,017760083             | 77,53560288              | 26,12350056              | 27,958 |
| 84 | 2,706             | 25,41221974              | 51,35807118              | 86,80211102              | 15,137760083             | 78,64871379              | 26,40350056              | 28,304 |
| 85 | 2,739             | 25,71963181              | 52,04117829              | 87,91122203              | 15,257760083             | 79,7618247               | 26,68350056              | 28,650 |
| 86 | 2,772             | 26,02704388              | 52,7242854               | 89,02033304              | 15,377760083             | 80,87493561              | 26,96350056              | 28,996 |
| 87 | 2,805             | 26,33445595              | 53,40739251              | 90,12944405              | 15,497760083             | 81,98804652              | 27,24350056              | 29,342 |
| 88 | 2,838             | 26,64186802              | 54,09050002              | 91,23855506              | 15,617760083             | 83,10115743              | 27,52350056              | 29,688 |
| 89 | 2,871             | 26,94928009              | 54,77360713              | 92,34766607              | 15,737760083             | 84,21426834              | 27,80350056              | 30,03  |

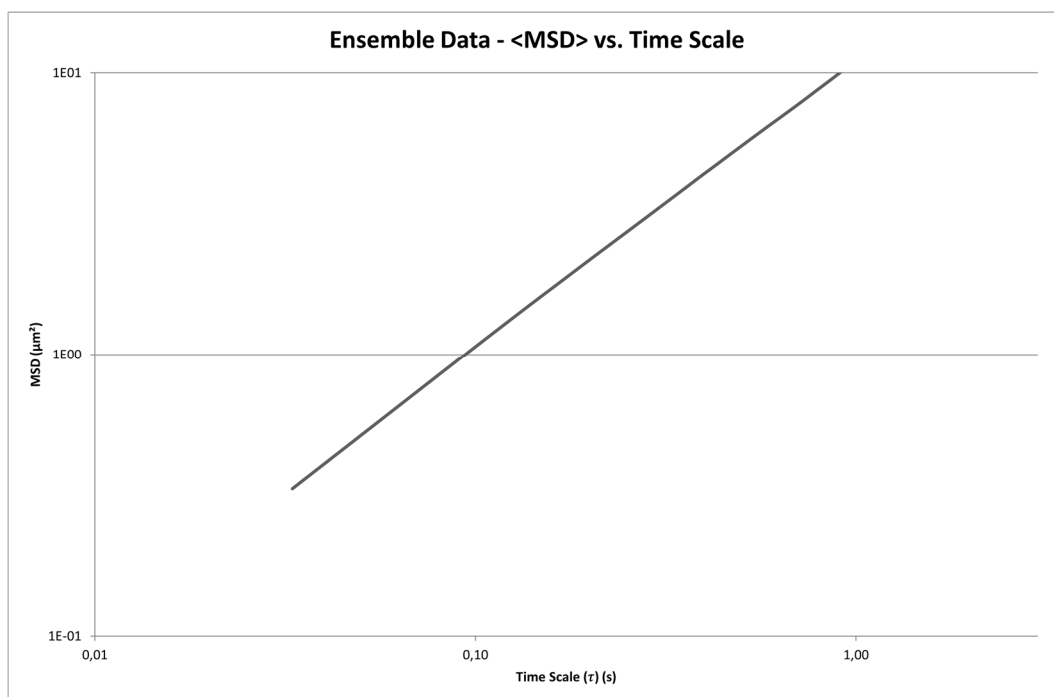

**Figure S2.** Example of a <MSD> vs. time scale graph generated in the 'Individual Particle Analysis' .xlsx file. Please note the logarithmic scales in both axes.

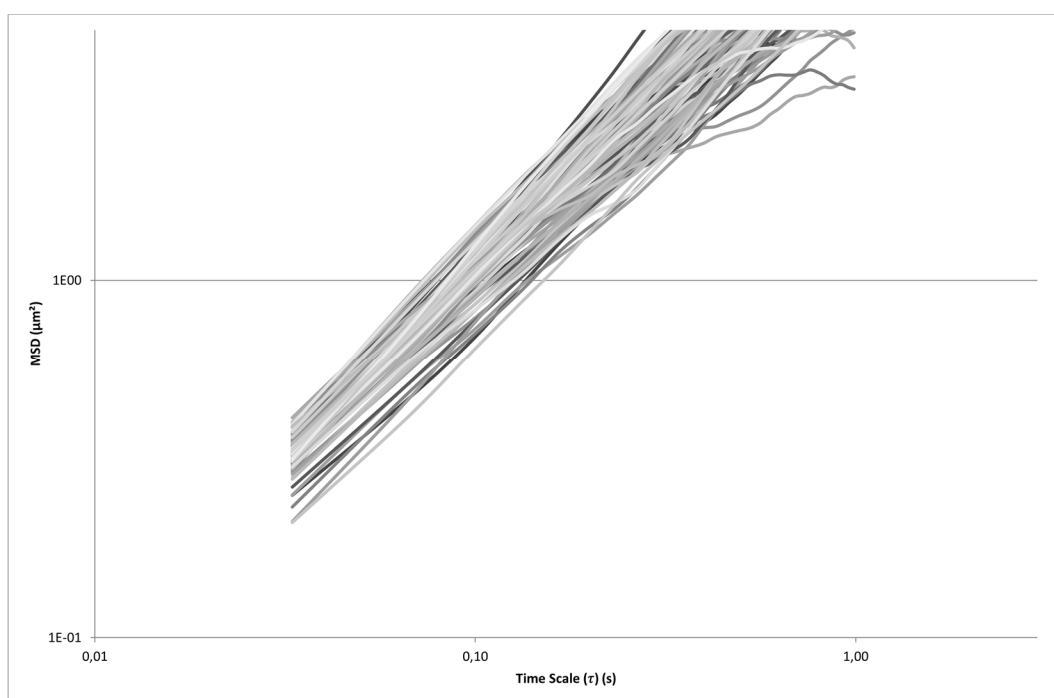

**Figure S3.** Example of a MSD vs. time scale graph generated in the 'Individual Particle Analysis' .xlsx file. Please note the logarithmic scales in both axes.

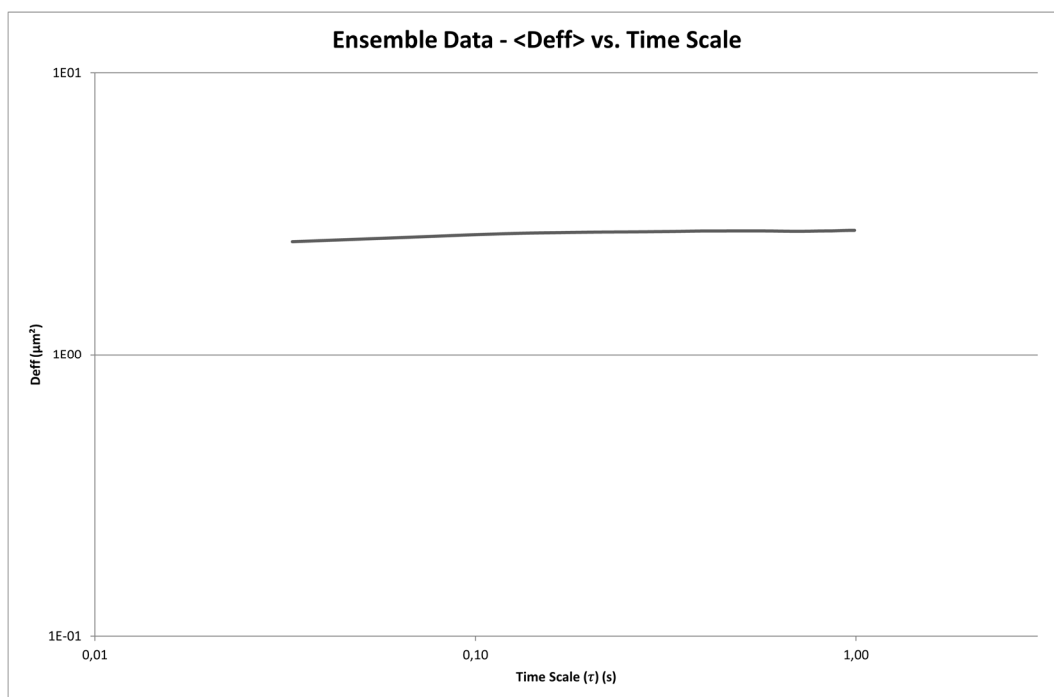

**Figure S4.** Example of a  $\langle D_{\text{eff}} \rangle$  vs. time scale graph generated in the 'Individual Particle Analysis' .xlsx file. Please note the logarithmic scales in both axes.

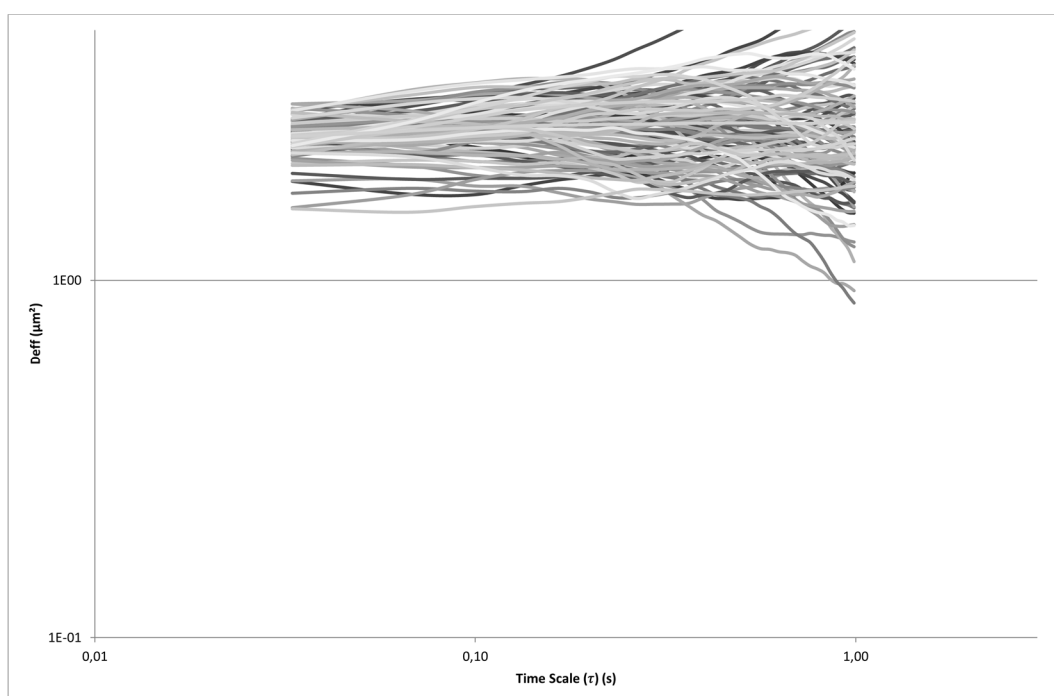

**Figure S5.** Example of a  $D_{\text{eff}}$  vs. time scale graph generated in the 'Individual Particle Analysis' .xlsx file. Please note the logarithmic scales in both axes.

|    | A                        | B                             | C                             | D                             | E                             | F                             | G                             |                               |
|----|--------------------------|-------------------------------|-------------------------------|-------------------------------|-------------------------------|-------------------------------|-------------------------------|-------------------------------|
| 1  |                          |                               |                               |                               |                               |                               |                               |                               |
| 2  | Timescale ( $\tau$ ) (s) | MSD-LOG 1 ( $\mu\text{m}^2$ ) | MSD-LOG 2 ( $\mu\text{m}^2$ ) | MSD-LOG 3 ( $\mu\text{m}^2$ ) | MSD-LOG 4 ( $\mu\text{m}^2$ ) | MSD-LOG 5 ( $\mu\text{m}^2$ ) | MSD-LOG 6 ( $\mu\text{m}^2$ ) | MSD-LOG 7 ( $\mu\text{m}^2$ ) |
| 3  | -1,48148606              | -0,444281536                  | -0,474633850                  | -0,444908085                  | -0,492581307                  | -0,476256710                  | -0,460360994                  | -0,444281536                  |
| 4  | -1,180456064             | -0,125900346                  | -0,147772640                  | -0,094134087                  | -0,178342705                  | -0,131297428                  | -0,157086044                  | -0,125900346                  |
| 5  | -1,004364805             | 0,049321968                   | 0,069687123                   | 0,115557763                   | -0,035447891                  | 0,049792851                   | 0,037922780                   | 0,049321968                   |
| 6  | -0,879426069             | 0,167182893                   | 0,210085232                   | 0,267812607                   | 0,068090390                   | 0,176873780                   | 0,178816905                   | 0,167182893                   |
| 7  | -0,782516056             | 0,247211155                   | 0,325495610                   | 0,388232134                   | 0,159944140                   | 0,284153404                   | 0,285510855                   | 0,247211155                   |
| 8  | -0,70333481              | 0,312163441                   | 0,410814614                   | 0,491437874                   | 0,240953622                   | 0,369621662                   | 0,375135933                   | 0,312163441                   |
| 9  | -0,63638802              | 0,377811135                   | 0,485901460                   | 0,582306381                   | 0,313895178                   | 0,451840573                   | 0,448076559                   | 0,377811135                   |
| 10 | -0,578396073             | 0,424675565                   | 0,547386433                   | 0,667509047                   | 0,374251227                   | 0,523842267                   | 0,507163480                   | 0,424675565                   |
| 11 | -0,527243551             | 0,471124644                   | 0,603589233                   | 0,741222907                   | 0,429807937                   | 0,583411214                   | 0,559410102                   | 0,471124644                   |
| 12 | -0,48148606              | 0,511591967                   | 0,652154983                   | 0,809716397                   | 0,483685124                   | 0,642089694                   | 0,602241473                   | 0,511591967                   |
| 13 | -0,440093375             | 0,554010797                   | 0,694779061                   | 0,872399348                   | 0,532631111                   | 0,690601268                   | 0,639882365                   | 0,554010797                   |
| 14 | -0,402304814             | 0,590991986                   | 0,731458101                   | 0,930325173                   | 0,580498190                   | 0,734796938                   | 0,675700018                   | 0,590991986                   |
| 15 | -0,367542708             | 0,626070206                   | 0,764572932                   | 0,981795211                   | 0,622074703                   | 0,778734324                   | 0,707587642                   | 0,626070206                   |
| 16 | -0,335358024             | 0,659543250                   | 0,797458353                   | 1,027355023                   | 0,661628918                   | 0,821181597                   | 0,738896946                   | 0,659543250                   |
| 17 | -0,305394801             | 0,691915663                   | 0,826303476                   | 1,067756539                   | 0,699821302                   | 0,858280892                   | 0,768886002                   | 0,691915663                   |
| 18 | -0,277366077             | 0,721598727                   | 0,855125398                   | 1,106816641                   | 0,737345922                   | 0,897832088                   | 0,798225346                   | 0,721598727                   |
| 19 | -0,251037139             | 0,745883001                   | 0,882494781                   | 1,144533921                   | 0,764551527                   | 0,936016682                   | 0,822393433                   | 0,745883001                   |
| 20 | -0,226213555             | 0,764011420                   | 0,910334271                   | 1,178637081                   | 0,792819667                   | 0,973088985                   | 0,847935396                   | 0,764011420                   |
| 21 | -0,202732459             | 0,782171219                   | 0,938444497                   | 1,210741576                   | 0,816073525                   | 1,007738075                   | 0,873578236                   | 0,782171219                   |
| 22 | -0,180456064             | 0,804739655                   | 0,966651797                   | 1,241125319                   | 0,833912995                   | 1,041347713                   | 0,899707596                   | 0,804739655                   |
| 23 | -0,159266765             | 0,823537303                   | 0,990732899                   | 1,267751490                   | 0,854175760                   | 1,072976683                   | 0,925422363                   | 0,823537303                   |
| 24 | -0,139063379             | 0,846204115                   | 1,016440340                   | 1,295498391                   | 0,873721893                   | 1,102484243                   | 0,951080105                   | 0,846204115                   |
| 25 | -0,119758224             | 0,866023521                   | 1,042730182                   | 1,322381461                   | 0,891385914                   | 1,129575642                   | 0,973991723                   | 0,866023521                   |
| 26 | -0,101274818             | 0,882209555                   | 1,068802815                   | 1,347281460                   | 0,906575601                   | 1,157058464                   | 0,995133175                   | 0,882209555                   |
| 27 | -0,083546051             | 0,897831268                   | 1,094059564                   | 1,369801230                   | 0,917895247                   | 1,185352244                   | 1,013112963                   | 0,897831268                   |
| 28 | -0,066512712             | 0,913664964                   | 1,117428588                   | 1,389879257                   | 0,924987274                   | 1,213631824                   | 1,030370021                   | 0,913664964                   |
| 29 | -0,050113306             | 0,929651176                   | 1,137763371                   | 1,407146558                   | 0,930824084                   | 1,242482087                   | 1,045072485                   | 0,929651176                   |

**Figure S6.** Example of generated ‘Transport Mode Characterization’ .xlsx file spreadsheet presenting raw analysis data after processing of input CSV files.

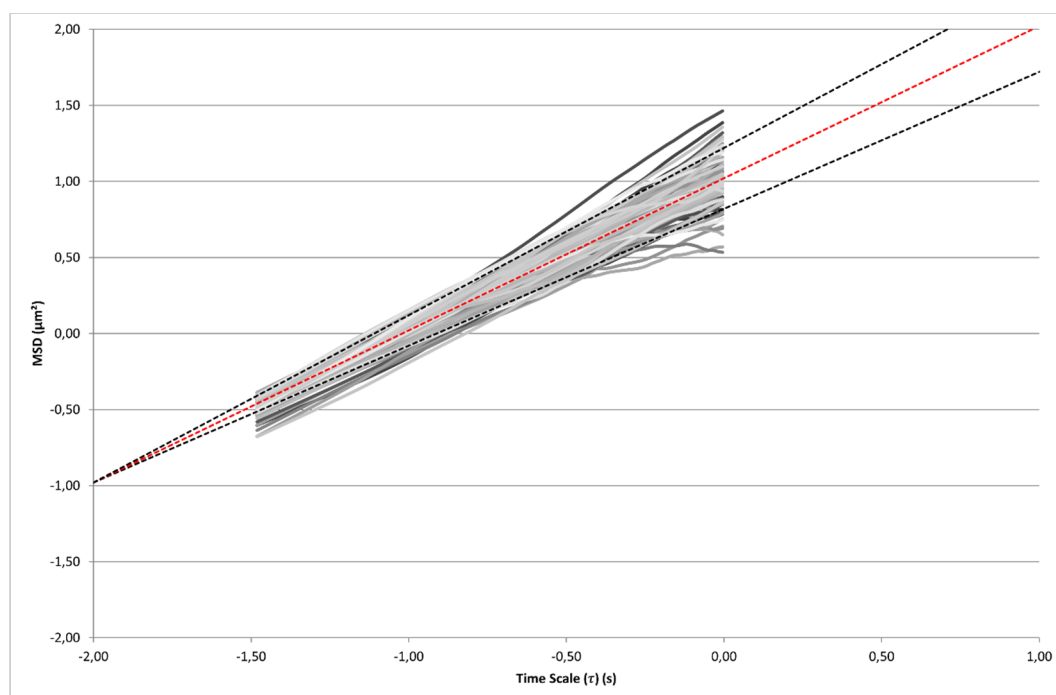

**Figure S7.** Example of a MSD vs. time scale graph generated in the ‘Transport Mode Characterization’ .xlsx file. Dashed lines presenting different slopes (0.9, 1.0 and 1.1) are included for guidance. Please note the linear scales in both axes.

|    | A           | B              | C                      | D              | E           | F     |
|----|-------------|----------------|------------------------|----------------|-------------|-------|
| 1  | Slopes      | Slopes (Excel) | R <sup>2</sup> (Excel) | Transport Mode | Slope       | Count |
| 2  | 0,946003222 | 0,946003222    | 0,999286258            | Immobile       | 0,0-0,199   | 0     |
| 3  | 1,113317046 | 1,113317046    | 0,999057535            | Sub-diffusive  | 0,2-0,899   | 19    |
| 4  | 1,340696417 | 1,340696417    | 0,998223359            | Diffusive      | 0,9-1,199   | 76    |
| 5  | 1,028013443 | 1,028013442    | 0,99645975             | Active         | 1,2+        | 7     |
| 6  | 1,225965352 | 1,225965352    | 0,994306885            |                |             |       |
| 7  | 1,044505004 | 1,044505004    | 0,999415628            |                |             |       |
| 8  | 0,990424520 | 0,99042452     | 0,998715094            | <slope> =      | 0,997907128 |       |
| 9  | 0,936409573 | 0,936409573    | 0,996765191            | N =            | 102         |       |
| 10 | 0,926102028 | 0,926102028    | 0,992990995            | STD =          | 0,134222422 |       |
| 11 | 0,820440377 | 0,820440377    | 0,979635679            |                |             |       |
| 12 | 1,014209825 | 1,014209824    | 0,993315373            |                |             |       |
| 13 | 0,802135139 | 0,802135139    | 0,989021957            |                |             |       |
| 14 | 0,978573239 | 0,978573239    | 0,997081521            |                |             |       |
| 15 | 1,040239918 | 1,040239918    | 0,992301314            |                |             |       |
| 16 | 1,083384612 | 1,083384612    | 0,998257775            |                |             |       |
| 17 | 0,946599831 | 0,946599831    | 0,996841926            |                |             |       |
| 18 | 1,132902333 | 1,132902333    | 0,997483036            |                |             |       |
| 19 | 1,061521906 | 1,061521906    | 0,991163249            |                |             |       |
| 20 | 0,880342849 | 0,88034285     | 0,929800207            |                |             |       |
| 21 | 1,255023774 | 1,255023774    | 0,99123038             |                |             |       |
| 22 | 1,124853122 | 1,124853122    | 0,9941365720           |                |             |       |

**Figure S8.** Example of a spreadsheet containing individual and ensemble data summary in the 'Transport Mode Characterization' .xlsx file.

|    | A                                                                   | B                                                              | C  | D                                                 | E      | F | G         | H                                   | I                                  | J                                 |
|----|---------------------------------------------------------------------|----------------------------------------------------------------|----|---------------------------------------------------|--------|---|-----------|-------------------------------------|------------------------------------|-----------------------------------|
| 1  | $D = \frac{k_B T}{6\pi \eta r}$                                     |                                                                |    |                                                   |        |   | Timestamp | D <sub>eff</sub>                    | D <sub>eff</sub>                   |                                   |
| 2  |                                                                     |                                                                |    |                                                   |        |   | (s)       | (μm <sup>2</sup> ·s <sup>-1</sup> ) | (m <sup>2</sup> ·s <sup>-1</sup> ) | D <sub>W</sub> / D <sub>eff</sub> |
| 3  |                                                                     |                                                                |    |                                                   |        |   | 0,99000   | 0,003471341                         | 3,47134E-15                        | 628,3169                          |
| 4  |                                                                     |                                                                |    |                                                   |        |   |           |                                     |                                    |                                   |
| 5  | D <sub>W</sub> (m <sup>2</sup> s <sup>-1</sup> )                    | 2,18110E-12                                                    | => | D <sub>W</sub> (μm <sup>2</sup> s <sup>-1</sup> ) | 2,1811 |   |           |                                     |                                    |                                   |
| 6  | K <sub>B</sub> (m <sup>2</sup> kg s <sup>-2</sup> K <sup>-1</sup> ) | 13,80649E-24                                                   |    |                                                   |        |   |           |                                     |                                    |                                   |
| 7  | T (K)                                                               | 298,15                                                         | <= | T (°C)                                            | 25     |   |           |                                     |                                    |                                   |
| 8  | Pi                                                                  | 3,1415927                                                      |    |                                                   |        |   |           |                                     |                                    |                                   |
| 9  | H <sub>2</sub> O viscosity (Pa.s)                                   | 0,0008900                                                      |    |                                                   |        |   |           |                                     |                                    |                                   |
| 10 | Radius (m)                                                          | 0,0000001                                                      | <= | Diameter (nm)                                     | 225    |   |           |                                     |                                    |                                   |
| 11 | NOTE: Pa.s = kg m <sup>-1</sup> s <sup>-1</sup>                     |                                                                |    |                                                   |        |   |           |                                     |                                    |                                   |
| 12 |                                                                     |                                                                |    |                                                   |        |   |           |                                     |                                    |                                   |
| 13 | Input cells                                                         | These cells are used to input known values                     |    |                                                   |        |   |           |                                     |                                    |                                   |
| 14 | Info cells                                                          | Informative cells to help understand the formula               |    |                                                   |        |   |           |                                     |                                    |                                   |
| 15 | Intermediate cells                                                  | These are cells used for the calculation. Must not be changed! |    |                                                   |        |   |           |                                     |                                    |                                   |
| 16 | Output cells                                                        | Desired results are in these cells.                            |    |                                                   |        |   |           |                                     |                                    |                                   |
| 17 |                                                                     |                                                                |    |                                                   |        |   |           |                                     |                                    |                                   |
| 18 |                                                                     |                                                                |    |                                                   |        |   |           |                                     |                                    |                                   |
| 19 |                                                                     |                                                                |    |                                                   |        |   |           |                                     |                                    |                                   |

**Figure S9.** Example of generated 'Stokes-Einstein Calculations' .xlsx file spreadsheet generated after processing of input CSV files.

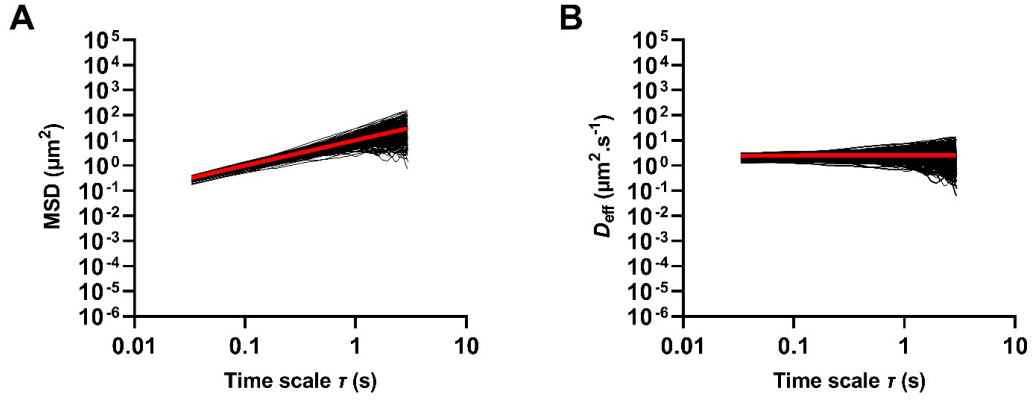

**Figure S10.** Individual (A) MSD and (B)  $D_{\text{eff}}$  of 200 nm COOH-PS NPs ( $\geq 100$  tracked particles per experiment;  $n = 3$ ) in water as a function of time scale. Ensemble values are also presented in red in both graphs.

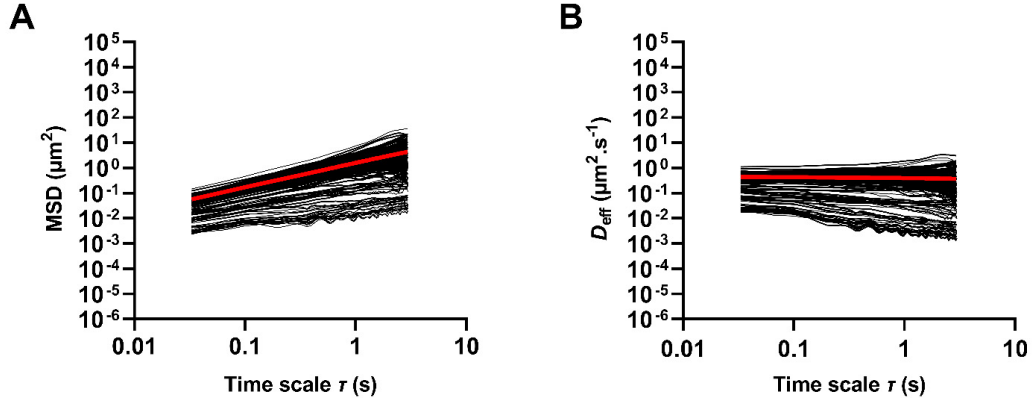

**Figure S11.** Individual (A) MSD and (B)  $D_{\text{eff}}$  of 200 nm COOH-PS NPs ( $\geq 100$  tracked particles per experiment;  $n = 3$ ) in mucus surrogate containing 3% mucin as a function of time scale. Ensemble values are also presented in red in both graphs.

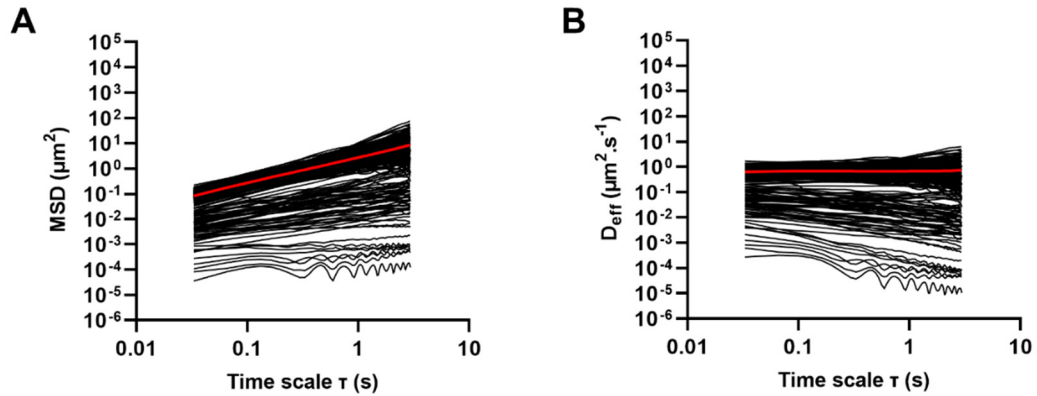

**Figure S12.** Individual (A) MSD and (B)  $D_{\text{eff}}$  of 100 nm COOH-PS NPs ( $\geq 100$  tracked particles per experiment;  $n = 3$ ) in mucus surrogate containing 3% mucin as a function of time scale. Ensemble values are also presented in red in both graphs.

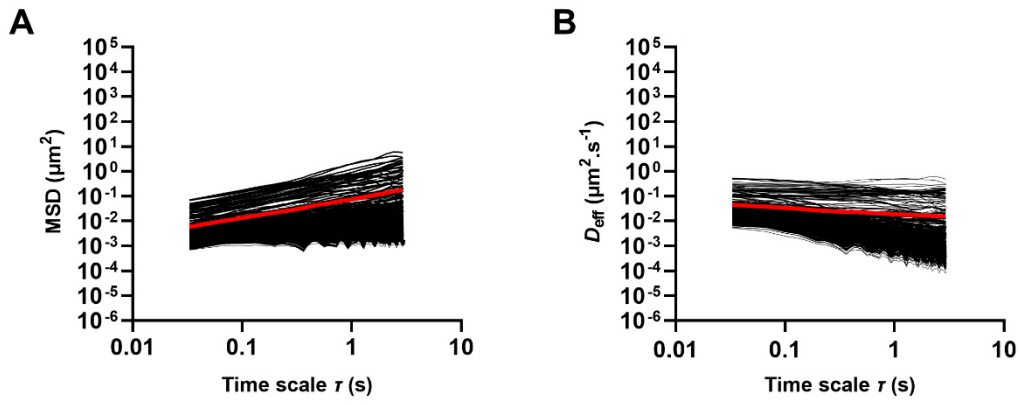

**Figure S13.** Individual (A) MSD and (B)  $D_{\text{eff}}$  of 100 nm COOH-PS NPs ( $\geq 100$  tracked particles per experiment;  $n = 3$ ) in mucus surrogate containing 5% mucin as a function of time scale. Ensemble values are also presented in red in both graphs.

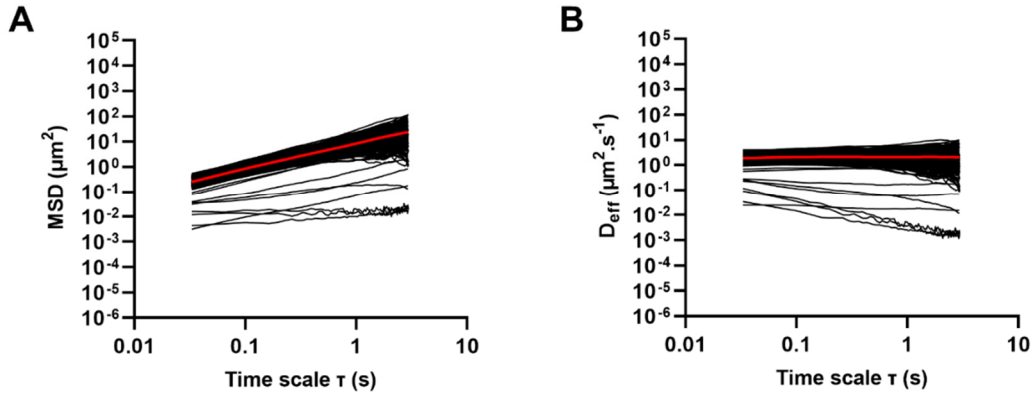

**Figure S14.** Individual (A) MSD and (B)  $D_{\text{eff}}$  of 100 nm PEG-modified COOH-PS NPs ( $\geq 100$  tracked particles per experiment;  $n = 3$ ) in mucus surrogate containing 3% mucin as a function of time scale. Ensemble values are also presented in red in both graphs.

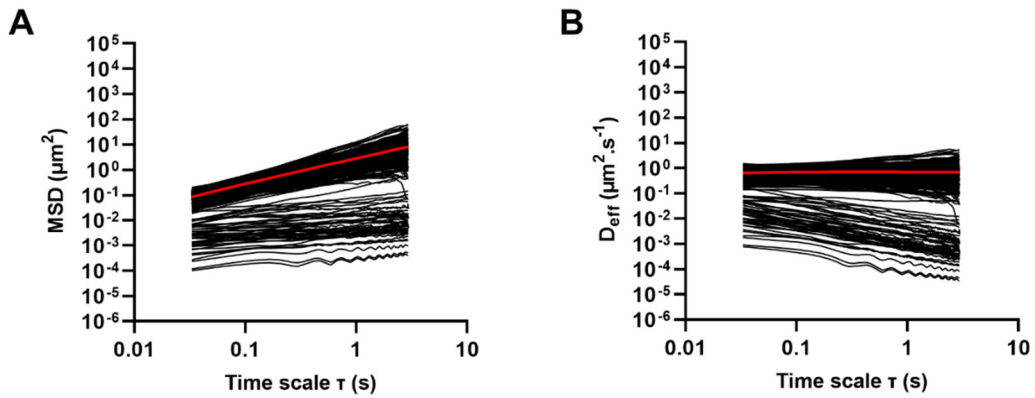

**Figure S15.** Individual (A) MSD and (B)  $D_{\text{eff}}$  of 100 nm PEG-modified COOH-PS NPs ( $\geq 100$  tracked particles per experiment;  $n = 3$ ) in mucus surrogate containing 5% mucin as a function of time scale. Ensemble values are also presented in red in both graphs.
